# Supplementary material
Source: PubMed Central journal article supplement (PMC3324776)
Supplement: NIHMS37015-supplement-Supplementary.pdf [file NIHMS37015-supplement-Supplementary.pdf]

# Online Supplemental Material for the article ”The impact of heat waves on mortality”

Antonio Gasparrini<sup>\*,†</sup> and Ben Armstrong

*Department of Social and Environmental Health Research  
London School of Hygiene and Tropical Medicine, UK*

## Contents

|                                             |           |
|---------------------------------------------|-----------|
| <b>S1 Modelling choices</b>                 | <b>2</b>  |
| S1.1 Covariates . . . . .                   | 2         |
| S1.2 Main effect of temperature . . . . .   | 2         |
| S1.3 Added effect during HWs . . . . .      | 3         |
| <b>S2 Sensitivity analysis</b>              | <b>4</b>  |
| <b>S3 Residual and correlation analysis</b> | <b>6</b>  |
| <b>S4 R and Stata code</b>                  | <b>7</b>  |
| S4.1 R code (first part) . . . . .          | 8         |
| S4.2 Stata code . . . . .                   | 12        |
| S4.3 R code (second part) . . . . .         | 12        |
| <b>Bibliography</b>                         | <b>16</b> |

---

\*Correspondance: Antonio Gasparrini, London School of Hygiene and Tropical Medicine, 15-17 Tavistock Place, London WC1H 9SH, UK

†E-mail: antonio.gasparrini@lshtm.ac.uk

## S1 Modelling choices

The city-specific model was defined in the manuscript as:

$$\log[E(Y_i)] = \alpha + \sum_{j=1}^P g_j(x_{ij}) + m(t_i) + w(t_i) \quad (\text{S1.1})$$

The following sections provide some further justifications about the choices on the functions to describe the effects of covariates  $g_j(x_j)$ , the main  $m(t)$  and the added  $w(t)$  effects of temperature .

### S1.1 Covariates

As explained in the text, the covariates  $x_j$  included in the model in (S1.1) are day of the week, dew point temperature, long time trend and seasonality. Their inclusion and specification is decided independently from statistical significance and actual confounding effect in the city-specific estimates, following the rationale of the NMMAPS analysis (Dominici et al., 2005, 2003).

Day of the week is specified as 6 indicator variables, while dew point temperature is characterized through a natural cubic spline with 3 df, 2 knots at equally-spaced percentiles. The effect of seasonality is modelled through a natural cubic spline with 4 df (3 equally-spaced knots), in order to describe the variation within the summer period considered here (June-September). This effect is supposed to remain constant across different years, following the assumptions of other analyses published earlier (Analitis et al., 2008; Baccini et al., 2008; Michelozzi et al., 2009). These studies used an indicator variable for month in order to model the seasonal effect. We use a similar number of df (1 per month), but describing the effect through a smooth function. Long time trend is included as a natural cubic spline with 3 df (2 equally-spaced knots), to capture the residual temporal variability.

### S1.2 Main effect of temperature

The main effect of temperature  $m(t)$  is specified by a *cross-basis*, a specific set of functions which can describe simultaneously the relationship both in the space of the predictor (temperature) and in the lags (Armstrong, 2006; Gasparrini et al., 2010). This choice allows a strong control of potentially non-linear and lagged effect, also accounting for short-time harvesting (if present), and is motivated by the need to accurately control for the effect of daily temperature occurrences. Given the strong correlation between the parameters used to describe the main and added effect, a weak control for the former might produce biased estimates for the latter, due to residual confounding effect.

The cross-basis functions can be described as tensor-products between the basis functions used to define the relationship in each dimension. Specifically, we use here a cubic spline with 6 df (without natural constraints, 3 knots at equally spaced values) to specify the dependency along the dimension of temperature, and a natural cubic spline with 5 df (3 knots at equally spaced values in the log scale, plus intercept) for the distributed lag effects, with 30 df overall. The maximum lag is fixed at 10, a period of time long enough to include delayed effects and short time harvesting.

We found that the fit of the model improves when relaxing the linearity constraints of the spline at

the boundaries of temperature distribution, using the same amount of df. This may be attributed to a strong non-linear effect of heat at very high temperatures, which is better described by the spline without natural constraints. The days showing high temperatures are likely to be defined as HW days: an underestimation of the main effect in this range can therefore result in a overestimation of the added effect.

We keep a natural cubic spline for the dimension of the lag in order to specify more knots with the same df (for the natural cubic splines  $df = k + 1$ , while for a simple cubic spline  $df = k + 3$ , with  $k$  number of knots). The knots are placed at equally-spaced values in the log scale (0.8, 1.9, 4.4 lags), assuring enough flexibility in the first lags, where more variability is expected (Muggeo, 2008; Peng and Dominici, 2009).

### S1.3 Added effect during HWs

The different HW definitions used in the first analysis with the simple indicator variables follow from choices already proposed in the literature (Anderson and Bell, 2009; Hajat et al., 2006). Regarding the second analysis on the effect of consecutive HW days, we fixed the threshold to the 97<sup>th</sup> city-specific percentile in order to obtain a suitable amount of HW days, and we pooled the results using a meta-analytical technique based on the multivariate extension of the method of moment estimator of Der Simonian and Laird (Jackson et al., 2010; White, 2009).

Given that many cities show only short HW periods, the maximum length is set to 10 days, coherently with the time frame used to specify the cross-basis functions for the main effect. HW days beyond that point will keep the value of 10. As explained in the manuscript, cities with maximum duration less than 10 days may contribute only to a subset of parameters of the two functions, strata and quadratic B-spline.

## S2 Sensitivity analysis

The robustness of the results to the various choices adopted in our modelling approach was tested through a sensitivity analysis. The main results obtained by varying the parameter of the functions  $g_j$ ,  $s$  and  $w$  in model (S1.1) are reported in the paper. Here we provide additional sensitivity analyses on the choices regarding the function  $f$  of consecutive HW days, evaluating graphically the differences for Figure 1 in the main text.

In particular:

- *13 days*: extending the maximum HW consecutive days to 13.
- *only 10 days*: restricting the analysis to the subsample of cities showing HW periods of at least 10 days (49 cities).
- *98<sup>th</sup>*: using the 98<sup>th</sup> percentile as a cut-off to define consecutive HW days.
- *REML*: using restricted maximum likelihood as estimation procedure for multivariate meta-analysis.

The results are summarized in [Figure S1](#).

The shape of the curve obtained by the original model in the main text does not seem to be strongly influenced by the changes listed above. Increasing the maximum number of consecutive HW days to 13 only slightly postpones the peak in risk. This result suggests that the risk is not confined to the first 10 HW days, but that additional effects can be associated to longer HW periods. Furthermore, this might be compensated by some harvesting effect at longer lags, as previously pointed out ([Hertel et al., 2009](#); [Kaiser et al., 2007](#); [Le Tertre et al., 2006](#)). The subsample of cities with maximum HW length of at least 10 days shows approximately the same relationship, indicating that the results are robust to city selection up to this point. Anyway, only a limited number of cities actually shows very long HW's, and this selection precludes the generalizability of the results beyond this HW length. Applying a more stringent definition for consecutive HW days based on the 98<sup>th</sup> percentile reveals a similar effect, but starting earlier within the HW periods. The results are robust to the estimation method selected for the multivariate meta-analysis, as expected given the large sample of cities.

The R and Stata code of the main analysis is included in [Section S4](#). The reader is free to perform further sensitivity checks changing the code directly.

Figure S1: Sensitivity analysis for the added effect (consecutive HW days)

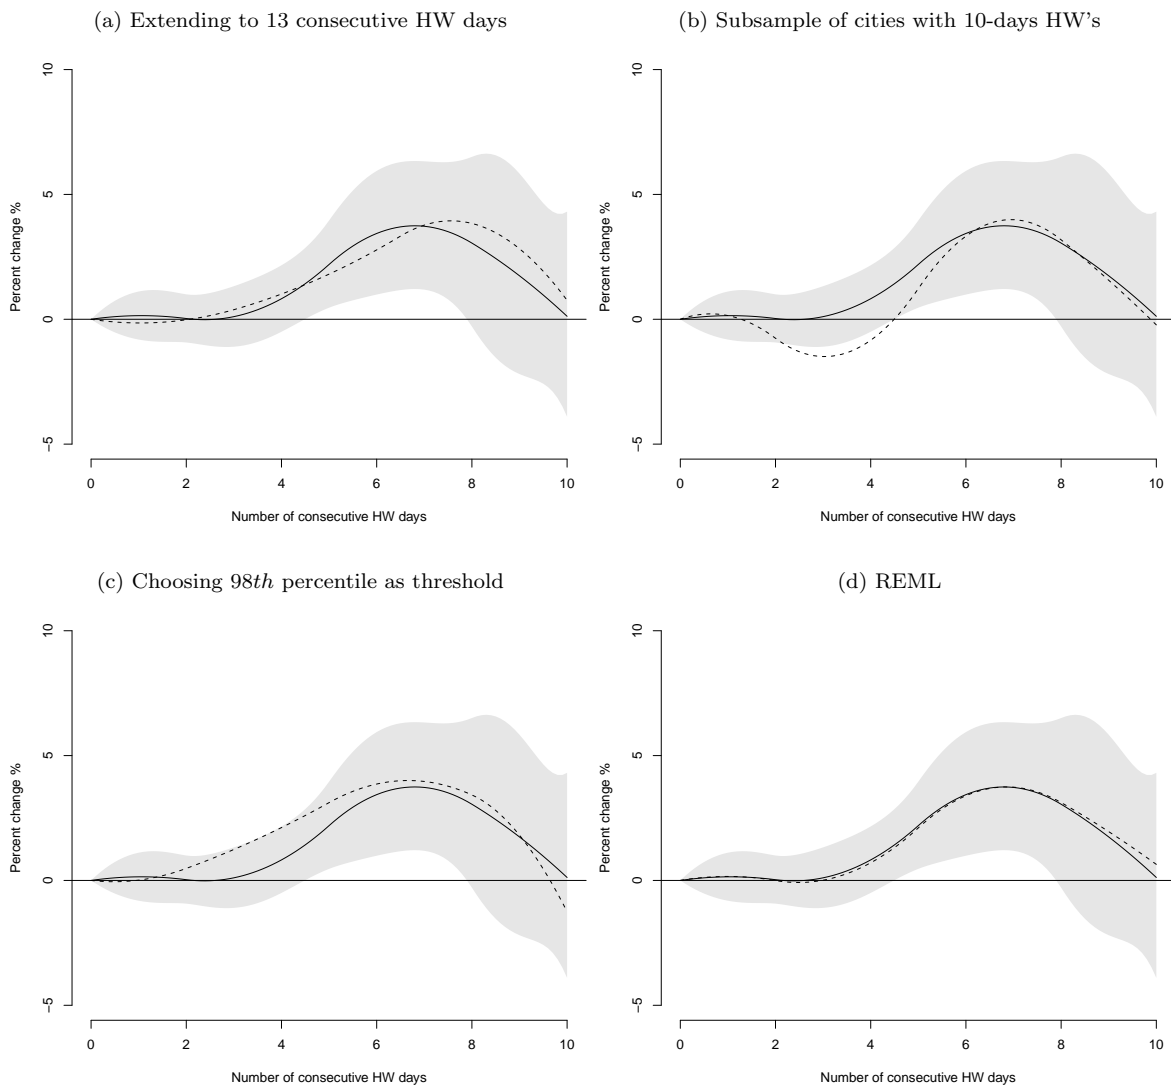

### S3 Residual and correlation analysis

In this Section we provide an analysis restricted to the city of Chicago, where two important HWs occurred in August 1988 and, particularly infamous, in July 1995. The results showed here are computed from the model where the added effect is specified with a continuous measure of consecutive HW days, defined using the 97<sup>th</sup> percentile and 2 days of minimum duration.

The correlation between mean temperature and HW terms is not very high, as in the rest of the NMMAPS cities. The coefficient  $r$  is 0.39 using the simple HW indicator and 0.33 for consecutive HW days. [Figure S2](#) illustrates the temperature distribution in HW and non-HW days. The plot shows a substantial overlap between the two distributions, due to the fact that HW days are defined not just in terms of temperature but also of duration, thus explaining the low correlation with the HW indicator.

Figure S2: Temperature distribution in HW and non-HW days

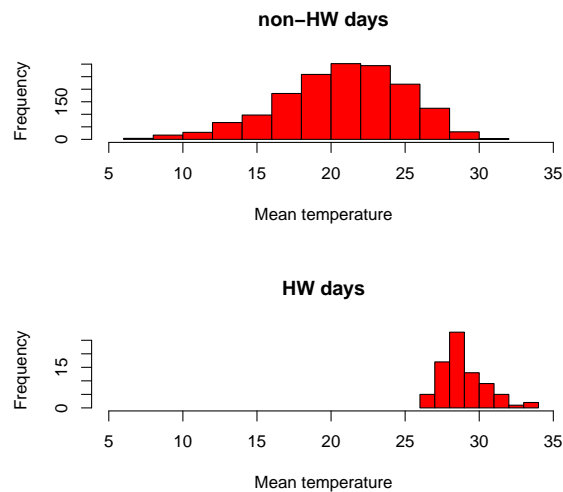

The analysis of standardized residuals suggests a good fit in general of the model, as illustrated in [Figure S3](#). However, it is possible to detect 2 outliers, corresponding to 2 days in July 1995 (under predicted) and August 1988 (over predicted).

More specifically, as depicted in [Figure S4](#), the model predicts the mortality quite well: in periods identified as HW days, the average observed-predicted number of deaths are 122.4-122.6 (12<sup>th</sup>-18<sup>th</sup> of August 1988) and 261.3-242.2 (13<sup>th</sup>-16<sup>th</sup> of July 1995).

Figure S3: Distribution, Q-Q plot and series of standardized residuals

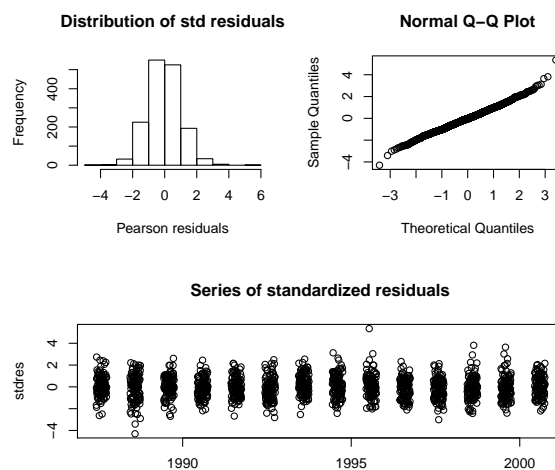

Figure S4: Observed and predicted mortality during August 1988 and July 1995

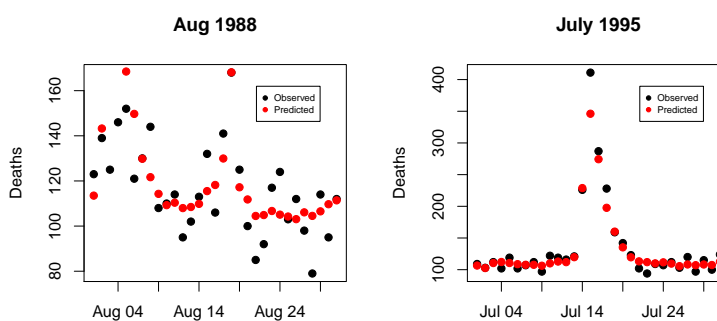

## S4 R and Stata code

R and Stata code to reproduce the main results of the analysis are included below. The first part of the R code (Section S4.1) performs the first-stage (city-level) model and store the results in a file readable from Stata, saved in the current directory. The Stata code (Section S4.2) then runs the multivariate meta-analysis and store the results in other Stata files. Finally, the second part of the R code (Section S4.3) imports the estimates back to R and produces the results for the first and second analysis reported in the paper.

Additional information on the specific analytical steps are provided as comments within the code. The reader should pay attention to run the code in the order explained above.

## S4.1 R code (first part)

```

require(dlnm);require(Epi);require(tsModel)
require(NMMAPSLite);require(metafor);require(foreign)

# FUNCTION TO CREATE AN HEAT WAVE INDICATOR FOR A TEMPERATURE SERIES
# BASED ON THE THRESHOLD AND THE DURATION, BY GROUPS
fun.hw.thr <- function(x,thr,dur,group=NULL) {
  as.numeric(apply(Lag(x)>=thr,0:(dur-1),group=group),
    1,sum,na.rm=T)>(dur-1))
}

# INITIALIZE THE DATASET
initDB()
cities <- listCities()

# CREATE THE MATRICES TO STORE THE RESULTS
# DESCRIPTIVE STATS
descr.tmean <- matrix(NA,length(cities),7, dimnames=list(cities,
  names(summary(c(1:10,NA))))))
hw.N <- matrix(NA,length(cities),6, dimnames=list(cities,
  paste("hw",rep(c(2,4),each=3),rep(c(97,98,99),2),sep=".")))
hw.cons <- matrix(NA,length(cities),4, dimnames=list(cities,
  c("N","Max",>3",>7")))
# REGRESSION MODELS
main.eff <- added.eff <- matrix(NA,length(cities),12,
  dimnames=list(cities,paste("hw",rep(c(2,4),each=6),rep(c(97,98,99),
  each=2),c("est","sd"),sep=".")))
strata.eff <- matrix(NA,length(cities),5,dimnames=list(cities,1:5))
strata.vcov <- vector("list",length(cities)) ; names(strata.vcov) <- cities
quad.eff <- strata.eff
quad.vcov <- strata.vcov
# MEAN SUMMER TEMPERATURE
meantemp <- 0

#####

# START THE LOOP FOR CITIES
time <- proc.time()

```



```

for(i in seq(length(cities))) {

  # LOAD AND PREPARE DATASET
  datatot <- readCity(cities[i], collapseAge = T)
  datatot$tmean <- (datatot$tmpd-32)*5/9
  datatot$time <- 1:nrow(datatot)
  datatot$year <- as.numeric(substr(datatot$date,1,4))
  datatot$month <- as.numeric(substr(datatot$date,6,7))
  datatot$doy <- sequence(tapply(datatot$year,datatot$year,length))
  datatot$dp01 <- filter(datatot$dptp,c(1,1)/2,side=1)
  percentiles <- quantile(datatot$tmean,c(75,97:99)/100,na.rm=T)
  data <- datatot[datatot$month%in%6:9,]

  # SAVE DESCRIPTIVE STATISTICS FOR TEMPERATURE
  descr.tmean[i,1:6] <- summary(data$tmean)[1:6]
  descr.tmean[i,7] <- sum(is.na(data$tmean))
  meantemp[i] <- mean(data$tmean,na.rm=T)

  # CREATE THE CROSSBASIS FOR THE MAIN TEMPERATURE-MORTALITY RELATIONSHIP
  # CENTERED ON 75TH PERCENTILE, REFERENCE VALUE FOR PREDICTED EFFECTS
  range <- round(range(data$tmean,na.rm=T),0)
  ktemp <- range[1] + (range[2]-range[1])/4*1:3
  basis <- crossbasis(data$tmean,group=data$year,vartype="bs",vardegree=3,
    varknots=ktemp,lagdf=5,maxlag=10,cenvalue=percentiles[1])

  #####
  # FIRST ANALYSIS: INDICATOR FOR DIFFERENT HW DEFINITIONS
  #####

  # HW DEFINITIONS
  hw.def <- cbind(rep(percentiles[2:4],2),rep(c(2,4),c(3,3)))

  # RUN THE MODEL FOR EACH DEFINITION
  for(k in 1:nrow(hw.def)) {

    # CREATE HEATWAVE INDICATOR FOR THE SPECIFIC HW DEFINITION
    hw <- fun.hw.thr(data$tmean,hw.def[k,1],hw.def[k,2],data$year)
    hw.N[i,k] <- sum(hw)

    # RUN THE MODEL

```

```

model.first <- glm(death ~ hw + basis + dow + ns(year,3) +
  ns(doy,df=4) + ns(dp01,df=3), family=quasipoisson(), data)
# SAVE MAIN EFFECT
if(sum(hw)>0) {
  tmedian <- median(data$tmean[hw==1],na.rm=T)
  pred <- crosspred(basis,model.first,
    at=c((range[1]+1):(range[2]-1),tmedian))
  main.eff[i,c(k*2-1,k*2)] <- cbind(pred$allfit,
    pred$allse)[as.character(tmedian),]
} else main.eff[i,c(k*2-1,k*2)] <- c(NA,NA)
# SAVE ADDED EFFECT
added.eff[i,c(k*2-1,k*2)] <- ci.lin(model.first)["hw",1:2]
}

#####
# SECOND ANALYSIS: STRATA AND QUAD SPLINE OF CONSECUTIVE HW DAYS
#####

# CREATE HEATWAVE INDICATOR AND CONSECUTIVE TERM (97TH PERCENTILE)
hw <- fun.hw.thr(data$tmean,percentiles[2],2,data$year)
# CREATE HW CONSECUTIVE DAYS (UP TO 10 DAYS)
hw.lin <- hw
for(j in 2:10) {
  hw.lin[apply(Lag(hw,0:(j-1),group=data$year),
    1,sum,na.rm=T)==j] <- j
}
# SAVE STATS ON CONSECUTIVE HW DAYS
hw.cons[i,] <- c(sum(hw),max(hw.lin),sum(hw.lin>3),sum(hw.lin>7))

# CREATE THE STRATA OF CONSECUTIVE HW DAYS
strata <- mkbasis(c(1:10,hw.lin),type="strata",
  knots=c(1,2,4,6,8))$basis[-(1:10),]
# RUN THE MODEL
model.strata <- glm(death ~ basis + strata + dow +
  ns(dp01,df=3) + ns(year,3) + ns(doy,df=4),
  family=quasipoisson(), data)
# SAVE THE RELATED COEF AND VCOV (INCLUDING MISSING)
index1 <- grep("strata",names(coef(model.strata)))
index2 <- (1:length(coef(model.strata)))[is.na(coef(model.strata))]
index <- index1[!index1%in%index2]

```

```

strata.eff[i,!index1%in%index2] <- ci.lin(model.strata)[index,1]
strata.vcov[[i]] <- matrix(NA,length(index1),length(index1))
strata.vcov[[i]][!index1%in%index2,!index1%in%index2] <-
  vcov(model.strata)[index,index]

# CREATE THE SPLINE OF CONSECUTIVE HW DAYS
quad <- bs(hw.lin,knots=c(2,5,8),Bound=c(0,10),degree=2)
# RUN THE MODEL
model.quad <- glm(death ~ basis + quad + dow + ns(dp01,df=3) +
  ns(year,3) + ns(doy,df=4),family=quasipoisson(), data)
# SAVE THE RELATED COEF AND VCOV (INCLUDING MISSING)
index1 <- grep("quad",names(coef(model.quad)))
index2 <- (1:length(coef(model.quad)))[is.na(coef(model.quad))]
index <- index1[!index1%in%index2]
quad.eff[i,!index1%in%index2] <- ci.lin(model.quad)[index,1]
quad.vcov[[i]] <- matrix(NA,length(index1),length(index1))
quad.vcov[[i]][!index1%in%index2,!index1%in%index2] <-
  vcov(model.quad)[index,index]
}
proc.time()-time
# TAKES APPROXIMATELY 5-6 MIN IN A 2GHZ LAPTOP

#####
# TO STATA
#####

index <- cbind(rep(1:5,5),rep(1:5,each=5))
names <- c(paste("b",1:5,sep="_"),
  paste("V",rep(1:5,5),rep(1:5,each=5),sep="_"))
temp1 <- temp2 <- matrix(0,length(cities),length(names))
for(i in 1:length(cities)) {
  temp1[i,] <- c(strata.eff[i,],strata.vcov[[i]][index])
  temp2[i,] <- c(quad.eff[i,],quad.vcov[[i]][index])
}

colnames(temp1) <- colnames(temp2) <- names

library(foreign)
write.dta(as.data.frame(temp1),"strata.dta")
write.dta(as.data.frame(temp2),"quad.dta")

```

## S4.2 Stata code

```
*cd "..."  
set more off  
  
* QUAD MM  
use quad, clear  
mvmeta b V, mm bscov  
matrix b = e(b)  
matrix V = e(V)  
clear  
svmat b  
svmat V  
save quad_mm, replace  
  
* STRATA MM  
use strata, clear  
mvmeta b V, mm bscov  
matrix b = e(b)  
matrix V = e(V)  
clear  
svmat b  
svmat V  
save strata_mm, replace
```

## S4.3 R code (second part)

```
#####  
# FROM STATA (STATA CODE SHOULD HAVE BEEN RUN)  
#####  
  
quad.pool.est <- as.matrix(read.dta("quad_mm.dta")[1,1:5])  
quad.pool.vcov <- as.matrix(read.dta("quad_mm.dta")[1:5,6:10])  
strata.pool.est <- as.matrix(read.dta("strata_mm.dta")[1,1:5])  
strata.pool.vcov <- as.matrix(read.dta("strata_mm.dta")[1:5,6:10])  
  
#####  
# RESULTS: DESCRIPTIVE STATISTICS  
#####
```

```

# SUMMARY FOR TMEAN
summary(descr.tmean[,c("Mean","NA's")])

# TOTAL NUMBER OF HW DAYS UNDER DIFFERENT HW DEFINITIONS
summary(hw.N)

# CONSECUTIVE HW DAYS (WITH 97TH PERCENTILE)
# % OF CITIES WITH MAX LENGTH >7 AND >9
sum(hw.cons[, "Max"]>6)/nrow(hw.cons)*100
sum(hw.cons[, "Max"]>9)/nrow(hw.cons)*100
# % OF CONSECUTIVE HW DAYS ABOVE 3 AND 7
colSums(hw.cons[,c(">3", ">7")])/sum(hw.cons[, "N"])*100

#####
# RESULTS: FIRST ANALYSIS
#####

label <- paste("hw",rep(c(2,4),each=3),rep(c(97,98,99),2),sep=".")
table1 <- matrix(NA,6,7,dimnames=list(label,
  c("N comm", "Est.main", "95%CI.main", "P-het.added", "Est.added",
    "95%CI.added", "P-het.added")))

for(i in 1:6) {

  # SET TO MISSING IF NO ESTIMATE FOR ADDED EFFECT
  added.eff[added.eff[,2*i]==0,c(2*i-1,2*i)] <- NA
  main.eff[is.na(added.eff[,2*i]),c(2*i-1,2*i)] <- NA

  # RUN THE META-ANALYSIS
  pool.main <- rma.uni(yi=main.eff[,2*i-1],sei=main.eff[,2*i])
  pool.added <- rma.uni(yi=added.eff[,2*i-1],sei=added.eff[,2*i])
  # FILL TABLE1
  table1[i,] <- c(sum(!is.na(added.eff[,2*i-1])),
    round(exp(pool.main$b)*100-100,1),
    paste(round(exp(pool.main$b-1.96*pool.main$se)*100-100,1),"to",
    round(exp(pool.main$b+1.96*pool.main$se)*100-100,1)),
    round(pool.main$QEp,3),
    round(exp(pool.added$b)*100-100,1),
    paste(round(exp(pool.added$b-1.96*pool.added$se)*100-100,1),"to",

```

```

    round(exp(pool.added$b+1.96*pool.added$se)*100-100,1)),
    round(pool.added$QEp,3))
}

# TABLE 1 IN THE MANUSCRIPT
table1

#####
# RESULTS: SECOND ANALYSIS
#####

# CREATE THE BASIS VARIABLES FOR PREDICTION
x <- 0:100/10
x.quad <- bs(x,knots=c(2,5,8),degree=2,Bound=c(0,10))
x.strata <- mkbasis(0:20/2,type="strata",knots=c(1,2,4,6,8))$basis

# PLOT
quad.plot <- cbind(x.quad%*%t(quad.pool.est),
  sqrt(diag(x.quad%*%quad.pool.vcov%*%t(x.quad))))

plot(x,exp(quad.plot[,1]),type="n",ylim=c(0.95,1.10),yaxt="n",
  ylab="Percent change %",
  xlab="Number of consecutive HW days",frame.plot=F)
axis(2,labels=-1:2*5,at=0.95+0:3*0.05)
polygon(c(x,rev(x)),c(exp(quad.plot[,1]+1.96*quad.plot[,2]),
  rev(exp(quad.plot[,1]-1.96*quad.plot[,2]))),border=NA,col=grey(0.9))
abline(h=1)
lines(x,exp(quad.plot[,1]))

strata.plot <- cbind(x.strata%*%t(strata.pool.est),
  sqrt(diag(x.strata%*%strata.pool.vcov%*%t(x.strata))))
lines(0:20/2,exp(strata.plot[,1]),type="S",lty=2)

```

## References

- Analitis, A., Katsouyanni, K., Biggeri, A., Baccini, M., Forsberg, B., Bisanti, L., Kirchmayer, U., Ballester, F., Cadum, E., Goodman, P., et al. (2008). Effects of cold weather on mortality: results From 15 European cities within the PHEWE Project. *American Journal of Epidemiology*, 168(12):1397.
- Anderson, B. G. and Bell, M. L. (2009). Weather-related mortality: how heat, cold, and heat waves affect mortality in the United States. *Epidemiology*, 20(2):205–213.
- Armstrong, B. (2006). Models for the relationship between ambient temperature and daily mortality. *Epidemiology*, 17(6):624–31.
- Baccini, M., Biggeri, A., Accetta, G., Kosatsky, T., Katsouyanni, K., Analitis, A., Anderson, H. R., Bisanti, L., D’Ippoliti, D., Danova, J., Forsberg, B., Medina, S., Paldy, A., Rabczenko, D., Schindler, C., and Michelozzi, P. (2008). Heat effects on mortality in 15 European cities. *Epidemiology*, 19(5):711–9.
- Dominici, F., McDermott, A., Daniels, M., Zeger, S. L., and Samet, J. M. (2005). Revised analyses of the National Morbidity, Mortality, and Air Pollution Study: mortality among residents of 90 cities. *Journal of Toxicology and Environmental Health: Part A*, 68(13-14):1071–92.
- Dominici, F., Sheppard, L., and Clyde, M. (2003). Health effects of air pollution: a statistical review. *International Statistical Review*, 71(2):243–276.
- Gasparri, A., Armstrong, B., and Kenward, M. G. (2010). Distributed lag non-linear models. *Statistics in Medicine*, page Epub ahead of print May 7. DOI: 10.1002/sim.3940.
- Hajat, S., Armstrong, B., Baccini, M., Biggeri, A., Bisanti, L., Russo, A., Paldy, A., Menne, B., and Kosatsky, T. (2006). Impact of high temperatures on mortality: is there an added heat wave effect? *Epidemiology*, 17(6):632–8.
- Hertel, S., Le Tertre, A., Jockel, K. H., and Hoffmann, B. (2009). Quantification of the heat wave effect on cause-specific mortality in Essen, Germany. *European Journal of Epidemiology*, 24(8):407–14.
- Jackson, D., White, I. R., and Thompson, S. G. (2010). Extending DerSimonian and Laird’s methodology to perform multivariate random effects meta-analyses. *Statistics in Medicine*, 29(12):1282–1297.
- Kaiser, R., Le Tertre, A., Schwartz, J., Gotway, C. A., Daley, W. R., and Rubin, C. H. (2007). The effect of the 1995 heat wave in Chicago on all-cause and cause-specific mortality. *American Journal of Public Health*, 97 Suppl 1:S158–62.
- Le Tertre, A., Lefranc, A., Eilstein, D., Declercq, C., Medina, S., Blanchard, M., Chardon, B., Fabre, P., Filleul, L., Jusot, J. F., Pascal, L., Prouvost, H., Cassadou, S., and Ledrans, M. (2006). Impact of the 2003 heatwave on all-cause mortality in 9 French cities. *Epidemiology*, 17(1):75–9.

- Michelozzi, P., Accetta, G., De Sario, M., D'Ippoliti, D., Marino, C., Baccini, M., Biggeri, A., Anderson, H., Katsouyanni, K., Ballester, F., et al. (2009). High temperature and hospitalizations for cardiovascular and respiratory causes in 12 European cities. *American Journal of Respiratory and Critical Care Medicine*, 179(5):383–389.
- Muggeo, V. M. (2008). Modeling temperature effects on mortality: multiple segmented relationships with common break points. *Biostatistics*, 9(4):613–620.
- Peng, R. D. and Dominici, F. (2009). A Bayesian hierarchical distributed lag model for estimating the time course of risk of hospitalization associated with particulate matter air pollution. *Journal of the Royal Statistical Society: Series A*, 58(1):3–24.
- White, I. R. (2009). Multivariate random-effects meta-analysis. *Stata Journal*, 9(1):40–56.
